# Supplementary material for: Vacuum-assisted colossal enhancement of up-conversion luminescence of lanthanide-doped nanoparticles upon NIR laser irradiation – a new strategy for phosphor development
Source: Royal Society of Chemistry journal article supplement (doi:10.1039/d4tc01293c), 2024-01-01
Supplement: d4tc01293c1.pdf [file d4tc01293c1.pdf]

## Supporting Information for:

### **Vacuum assisted colossal enhancement of up-conversion luminescence of lanthanide-doped nanoparticles upon NIR laser irradiation – a new strategy for phosphors development**

Christian Hernández-Álvarez<sup>1,\*</sup>, Kevin Soler-Carracedo<sup>2</sup>, Przemysław Woźny<sup>2</sup>, Inocencio R. Martín<sup>1</sup>, Marcin Runowski<sup>2,\*</sup>

<sup>1</sup>*Universidad de La Laguna, Departamento de Física, MALTA- Consolider Team, IMN and IUdEA Apdo. Correos 456, E-38206, San Cristóbal de La Laguna, Santa Cruz de Tenerife, Spain. E-mail: chernaal@ull.edu.es*

<sup>2</sup>*Adam Mickiewicz University, Faculty of Chemistry, Uniwersytetu Poznańskiego 8, 61-614 Poznań, Poland. E-mail: runowski@amu.edu.pl*

**Figure S1** shows the corresponding up-conversion emission spectra of the YVO<sub>4</sub>: 20% Yb<sup>3+</sup>, 2% Er<sup>3+</sup> material recorded with the same system (after the experiment), by measuring the spectra at decreasing laser power. It is clear, that the intensity of the Er<sup>3+</sup> ions emission increased even more (due to the limited thermal quenching) and the 525/550 nm band ratio decreased, when the sample cooled down to room temperature, and the laser heating was not further observed.

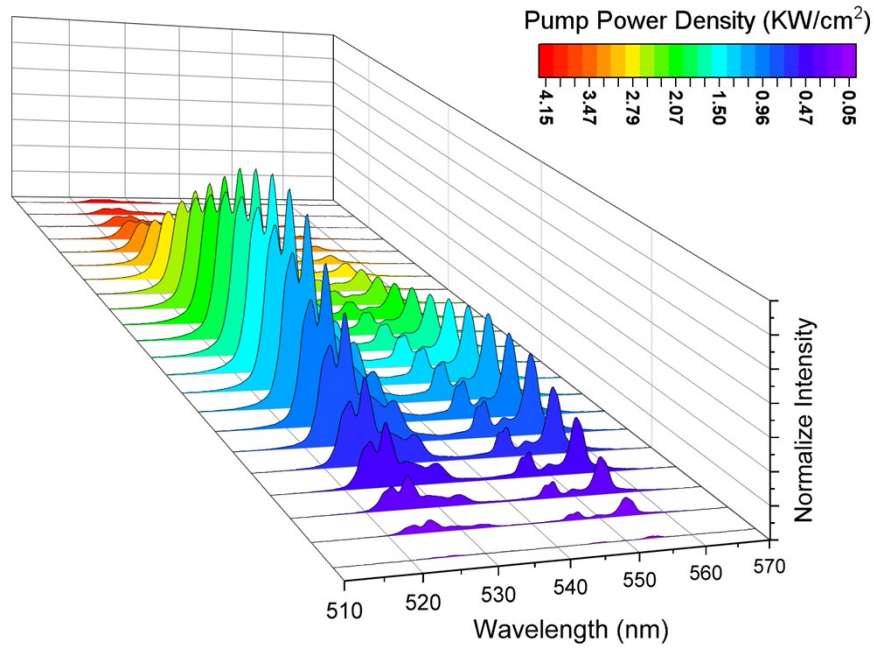

**Figure S1.** Emission spectra as function of pump power density of the YVO<sub>4</sub>: 20% Yb<sup>3+</sup>, 2% Er<sup>3+</sup>.

In **Figure S2a** and **b**, it can be seen the blackbody radiation spectra for the Tm<sup>3+</sup> and Er<sup>3+</sup>-doped samples, respectively, when the maximum temperature values were achieved. The spectra were fitted to the Plank equation in order to obtain the maximum temperature achieved:

$$I(\lambda, T) = A \frac{2\pi hc^2}{\lambda^5} \frac{1}{e^{\left(\frac{hc}{\lambda k_B T}\right)} - 1} \quad (1)$$

where  $A$  is a constant,  $h = 6.626 \cdot 10^{-34}$  J·s is Planck constant,  $c = 3 \cdot 10^8$  m/s is the speed of light,  $\lambda$  is the wavelength,  $k_B = 1.381 \cdot 10^{-23}$  J/K is Boltzmann constant, and  $T$  is the temperature. The estimated temperature values obtained from this fitting were  $T = 1422$  K and  $T = 1769$  K for  $\text{YVO}_4$ : 20%  $\text{Yb}^{3+}$ , 0.5%  $\text{Tm}^{3+}$  and  $\text{YVO}_4$ : 20%  $\text{Yb}^{3+}$ , 2%  $\text{Er}^{3+}$ , respectively.

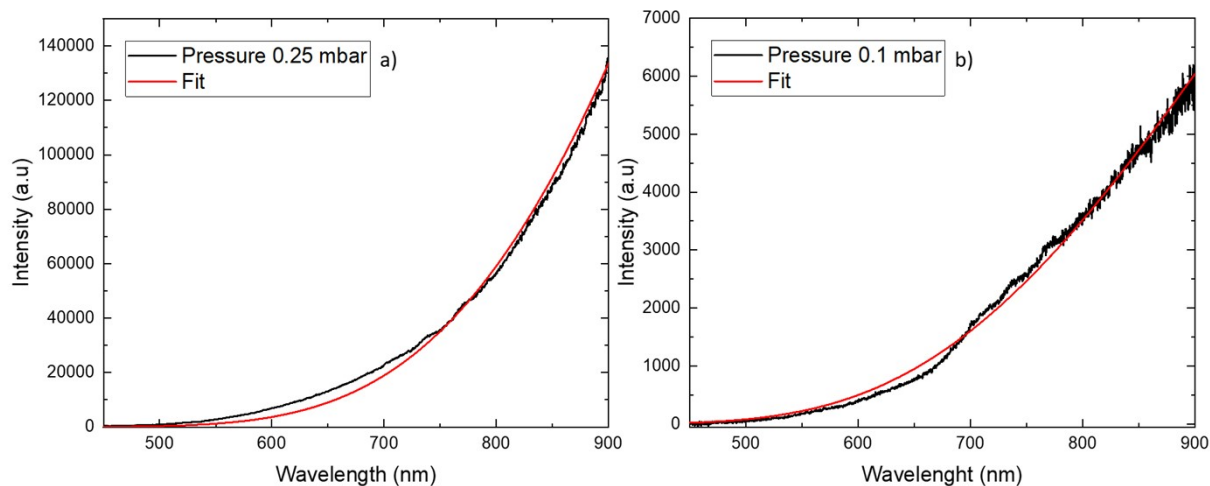

**Figure S2.** Fitting of one of the corrected curves to calculate the temperature reached with laser and vacuum at the same time for samples (a)  $\text{YVO}_4$ : 20%  $\text{Yb}^{3+}$ , 0.5%  $\text{Tm}^{3+}$  and (b)  $\text{YVO}_4$ :20%  $\text{Yb}^{3+}$ , 2%  $\text{Er}^{3+}$ .
